# Supplementary material for: Genome-wide maps of CPD deamination in yeast reveal the impact of DNA sequence context and nucleosome architecture on cytosine deamination rates
Source: Genome Res. 2026 Jan;36(1):183–96. doi: 10.1101/gr.280384.124 (PMC12887450; doi:10.1101/gr.280384.124)
Supplement: Supplement 19 [file Supplemental_Data.xlsx]

## Sheet: Figure_1
Figure 1C.					Figure 1E.	Fraction Total Reads mapping to each DNA base									Figure 1F.
	Uracils/kilobase					A		T		G		C				Fraction Total Reads
Time (h)	Replicate 1	Replicate 2	Replicate 3		Timepoint	Replicate 1	Replicate 2	Replicate 1	Replicate 2	Replicate 1	Replicate 2	Replicate 1	Replicate 2		Trinucleotide Context	Replicate 1	Replicate 2
0	-0.0151533	0.00769991	-0.0100806		0h	0.160236	0.299735	0.0874965	0.0996365	0.135616	0.118698	0.616651	0.48193		ACA	0.0008801	0.00089764
6	0.063821	0.120086	0.0480715		6h	0.0694311	0.0693508	0.0178889	0.0121806	0.0408216	0.0377307	0.871858	0.880738		ACC	0.00856103	0.0105459
24	0.244583	0.194309	0.314037		24h	0.0612449	0.0703319	0.00978124	0.00894129	0.057431	0.0595112	0.871543	0.861216		ACG	0.00051342	0.00053511
48	0.490955	0.331498	0.391003		48h	0.071971	0.0892605	0.00750218	0.00830578	0.0786078	0.0897786	0.841919	0.812655		ACT	0.0830253	0.101646
No UV*	-0.0109071	-0.0051073	-0.0040307												CCA	0.00700594	0.00542324
															CCC	0.00651358	0.0059866
*graphed for visual simplicity on x axis at 60 hours															CCG	0.00089635	0.00066829
															CCT	0.064368	0.063456
															GCA	0.00066874	0.00055004
															GCC	0.0034122	0.00376032
															GCG	0.00028474	0.0002362
															GCT	0.0471637	0.0498497
															TCA	0.213242	0.203995
															TCC	0.102771	0.101038
															TCG	0.0819564	0.0714456
															TCT	0.25028	0.241182
															*Trinucleotide contexts are indicated with bolded text

## Sheet: Figure_2
Figure 2C						(Same as Fig. 1C)			Figure 2D.	Fraction Total Reads mapping to each DNA base													Figure 2E.	Fraction Total Reads (24 h timepoint)
Cells Alkaline gel	Cells Alkaline gel				naked DNA				Timepoint	A			T			G			C				Trinucleotide context	Replicate 1	Replicate 2	Replicate 3
0	0.0136716	0.00322145	0.0432385		-0.0151533	0.00769991	-0.0100806		No UV	0.29248			0.252894			0.230918			0.223708				ACA	0.00355342	0.00319257	0.00372633
6	0.142129	0.281144	0.19219		0.063821	0.120086	0.0480715		0h	0.196854		0.206752	0.136636		0.16201	0.0951119		0.133019	0.571399		0.498219		ACC	0.0126201	0.0114791	0.0133185
24	0.438227	0.539622	0.552123		0.244583	0.194309	0.314037		6h	0.0809041	0.0603159	0.0783964	0.0842047	0.0617246	0.0747079	0.0441938	0.0404944	0.0597689	0.790697	0.837465	0.787127		ACG	0.00165455	0.00155814	0.001239
48	0.515079	0.584739	0.54335		0.490955	0.331498	0.391003		24h	0.0605989	0.0480202	0.0559412	0.0690121	0.0501414	0.0610665	0.0357267	0.0347675	0.0390692	0.834662	0.867071	0.843923		ACT	0.0970031	0.0820641	0.0682328
									48h	0.0767315	0.0616969	0.0620008	0.0736401	0.064352	0.0667168	0.0435436	0.046732	0.0432608	0.806085	0.827219	0.828022		CCA	0.0136932	0.0199657	0.0186778
									Full			0.121247			0.0806335			0.104165			0.693955		CCC	0.00959429	0.0110798	0.0133913
																							CCG	0.00220615	0.00304098	0.00244462
																							CCT	0.0633809	0.0852729	0.0792454
																							GCA	0.00258895	0.00311111	0.00351459
																							GCC	0.00455091	0.00514646	0.00595395
																							GCG	0.0010075	0.00117079	0.00089652
																							GCT	0.042389	0.0472631	0.0388597
																							TCA	0.170619	0.171894	0.183417
																							TCC	0.0889339	0.0926782	0.0968859
																							TCG	0.0950933	0.0987476	0.0787692
																							TCT	0.225774	0.229406	0.23535
																							*Trinucleotide contexts are indicated with bolded text

## Sheet: Figure_3
Figure 3A	Trinucleotide Enrichment for each TCN context													Figure 3B	Trinucleotide Enrichment for each NCT context													Figure 3C	Trinucleotide Enrichment for each NCC/CCN context																Fig. 3D		dCPD freq (x 10^-3)
Timepoint (h)	TCA			TCC			TCG			TCT				Timepoint (h)	ACT			CCT			GCT			TCT				Timepoint (h)	ACC			CCA			CCC			CCG			GCC					time	TCA	TCC	TCG
6	6.24013	6.70605	6.864	4.85122	5.28407	5.17387	14.9303	15.8961	14.1225	8.5531	9.31381	9.03847		6	5.90807	5.6805	4.66252	7.75818	8.24014	7.92468	4.08668	4.51929	3.69522	8.5531	9.31381	9.03847		6	0.896892	0.820277	0.752967	1.55493	1.66774	1.66733	1.59015	1.51499	1.53394	0.725715	0.847911	0.753761	0.647322	0.606893	0.554939			0	0.0711675	0.0487361	0.198879
24	8.43707	8.50012	9.06992	6.98688	7.28104	7.61161	10.4098	10.8098	8.62277	11.1408	11.3201	11.6134		24	6.39915	5.41366	4.50122	5.53878	7.45191	6.92517	3.68295	4.10643	3.3763	11.1408	11.3201	11.6134		24	1.08918	0.990703	1.14946	0.916881	1.33688	1.25064	1.42342	1.64381	1.98674	0.379309	0.522844	0.420309	0.57768	0.653278	0.755779			6	1.3842	1.07208	3.11673
48	8.10425	8.3938	8.7391	7.50198	8.13983	8.49281	6.94327	7.68924	6.57737	10.8284	11.3405	11.9795		48	5.60609	4.62993	3.94047	6.33415	6.37274	6.43373	3.49074	3.5904	3.18707	10.8284	11.3405	11.9795		48	1.49105	1.39165	1.51412	1.06811	1.18644	1.01802	2.18655	2.06659	2.56748	0.47558	0.528371	0.447814	0.802751	0.907317	1.01645			24	4.39265	3.734	5.25987
60	6.51896			8.17129			4.50017			9.49558				60	3.20131			4.47603			2.61946			9.49558				60	2.52726			0.742827			3.519			0.497094			1.65921					48	4.62899	4.47197	4.01872
[truncated: 13 more columns]

## Sheet: Supplemental_Fig_1
Fig. S1A. 0h	Fraction Total Reads			Fig. S1B. 6h	Fraction Total Reads			Fig. S1C. 24 h	Fraction Total Reads			Fig. S1D. 48 h	Fraction Total Reads
Trinucleotide Context	Replicate 1	Replicate 2		Trinucleotide Context	Replicate 1	Replicate 2		Trinucleotide Context	Replicate 1	Replicate 2		Trinucleotide Context	Replicate 1	Replicate 2
ACA	0.00861652	0.0122786		ACA	0.00164275	0.00133219		ACA	0.0008801	0.00089764		ACA	0.00075477	0.00089579
ACC	0.0115911	0.00997402		ACC	0.00406099	0.00458292		ACC	0.00856103	0.0105459		ACC	0.0132345	0.0169339
ACG	0.00323061	0.00529462		ACG	0.00081397	0.00070309		ACG	0.00051342	0.00053511		ACG	0.00048865	0.0005845
ACT	0.0667163	0.0518645		ACT	0.0848626	0.11071		ACT	0.0830253	0.101646		ACT	0.0738577	0.0891791
CCA	0.0144028	0.026136		CCA	0.00971736	0.00895457		CCA	0.00700594	0.00542324		CCA	0.00536516	0.00430852
CCC	0.00754585	0.00827386		CCC	0.00428157	0.00431459		CCC	0.00651358	0.0059866		CCC	0.00892365	0.00869524
CCG	0.00339354	0.0058668		CCG	0.0012956	0.00114822		CCG	0.00089635	0.00066829		CCG	0.00078106	0.00064272
CCT	0.0501769	0.0392025		CCT	0.0643272	0.0733805		CCT	0.064368	0.063456		CCT	0.0596204	0.0595634
GCA	0.0106415	0.011114		GCA	0.00148731	0.00106624		GCA	0.00066874	0.00055004		GCA	0.00050863	0.00052991
GCC	0.00632157	0.00544394		GCC	0.00175107	0.00173716		GCC	0.0034122	0.00376032		GCC	0.00538966	0.00638341
GCG	0.00272321	0.00327046		GCG	0.00048533	0.00039242		GCG	0.00028474	0.0002362		GCG	0.00024068	0.00025505
GCT	0.0441905	0.0322769		GCT	0.0483899	0.0589388		GCT	0.0471637	0.0498497		GCT	0.0419418	0.0456799
TCA	0.125202	0.0856134		TCA	0.20572	0.199303		TCA	0.213242	0.203995		TCA	0.196551	0.17848
TCC	0.0642631	0.0316611		TCC	0.0755918	0.0760153		TCC	0.102771	0.101038		TCC	0.119675	0.112165
TCG	0.052537	0.0891453		TCG	0.143892	0.120701		TCG	0.0819564	0.0714456		TCG	0.0676048	0.0582069
TCT	0.145098	0.0645143		TCT	0.223539	0.217457		TCT	0.25028	0.241182		TCT	0.246981	0.230152
*Trinucleotide contexts are indicated with bolded text

## Sheet: Supplemental_Fig_2
	Uracils/kilobase
Time (h)	Replicate 1	Replicate 2	Replicate 3
0	0.0136716	0.00322145	0.0432385
6	0.142129	0.281144	0.19219
24	0.438228	0.539622	0.552124
48	0.515079	0.584739	0.54335
No UV*	0.00551278	-0.0032124	-0.0136189
*graphed for visual simplicity on x axis at 60 hours
	(Same as Fig. 2C)

## Sheet: Supplemental_Fig_3
Fig. S2A. No UV	Fraction Total Reads		Fig. S2B. 0h	Fraction Total Reads			Fig. S2C. 6h	Fraction Total Reads				Fig. S2D. 24h	Fraction Total Reads				Fig. S2E. 48h	Fraction Total Reads				Fig. S2F. Full	Fraction Total Reads
Trinucleotide Context	Replicate 1		Trinucleotide Context	Replicate 1	Replicate 2		Trinucleotide Context	Replicate 1	Replicate 2	Replicate 3		Trinucleotide Context	Replicate 1	Replicate 2	Replicate 3		Trinucleotide Context	Replicate 1	Replicate 2	Replicate 3		Trinucleotide Context	Replicate 1
ACA	0.0158486		ACA	0.0139392	0.015919		ACA	0.005079	0.005016	0.005605		ACA	0.00355342	0.00319257	0.00372633		ACA	0.00364041	0.00405798	0.00383497		ACA	0.0056886
ACC	0.00954455		ACC	0.0147354	0.012557		ACC	0.010392	0.009504	0.008724		ACC	0.0126201	0.0114791	0.0133185		ACC	0.0172765	0.0161247	0.0175438		ACC	0.0292828
ACG	0.00718833		ACG	0.00707835	0.00549254		ACG	0.002587	0.002501	0.00191		ACG	0.00165455	0.00155814	0.001239		ACG	0.00164584	0.00188429	0.00138949		ACG	0.00213137
ACT	0.0100237		ACT	0.0678534	0.0400296		ACT	0.089559	0.086109	0.070678		ACT	0.0970031	0.0820641	0.0682328		ACT	0.0849812	0.0701838	0.0597325		ACT	0.0485278
CCA	0.0325397		CCA	0.0305544	0.0354745		CCA	0.023222	0.024907	0.024901		CCA	0.0136932	0.0199657	0.0186778		CCA	0.0159518	0.017719	0.0152036		CCA	0.0110938
CCC	0.0121665		CCC	0.0124388	0.012787		CCC	0.010718	0.010212	0.010339		CCC	0.00959429	0.0110798	0.0133913		CCC	0.0147381	0.0139295	0.0173056		CCC	0.0237192
CCG	0.0114311		CCG	0.00789906	0.00857404		CCG	0.004221	0.004932	0.004384		CCG	0.00220615	0.00304098	0.00244462		CCG	0.00276609	0.00307313	0.00260459		CCG	0.00289122
CCT	0.01623		CCT	0.0646539	0.0472457		CCT	0.088778	0.094293	0.090683		CCT	0.0633809	0.0852729	0.0792454		CCT	0.0724823	0.0729239	0.0736218		CCT	0.0512196
GCA	0.011804		GCA	0.0105184	0.013144		GCA	0.004473	0.004508	0.004894		GCA	0.00258895	0.00311111	0.00351459		GCA	0.0027963	0.00396705	0.0034582		GCA	0.00525979
GCC	0.00436909		GCC	0.00807497	0.00717816		GCC	0.0051	0.004781	0.004372		GCC	0.00455091	0.00514646	0.00595395		GCC	0.006324	0.00714776	0.00800752		GCC	0.0130711
GCG	0.00451401		GCG	0.00493678	0.00362687		GCG	0.001872	0.001856	0.001264		GCG	0.0010075	0.00117079	0.00089652		GCG	0.00105778	0.00146859	0.00095466		GCG	0.00153943
GCT	0.00659558		GCT	0.0339481	0.0266882		GCT	0.047036	0.052015	0.04253		GCT	0.042389	0.0472631	0.0388597		GCT	0.0401768	0.0413238	0.0366817		GCT	0.0301487
TCA	0.0287306		TCA	0.0785488	0.0706453		TCA	0.126191	0.135613	0.138808		TCA	0.170619	0.171894	0.183417		TCA	0.163889	0.169744	0.176727		TCA	0.13183
TCC	0.0167053		TCC	0.032621	0.030663		TCC	0.06175	0.067259	0.065857		TCC	0.0889339	0.0926782	0.0968859		TCC	0.0954906	0.103609	0.108103		TCC	0.10401
TCG	0.011961		TCG	0.0962678	0.0896742		TCG	0.136388	0.145211	0.129009		TCG	0.0950933	0.0987476	0.0787692		TCG	0.0634269	0.0702414	0.0600844		TCG	0.0411091
TCT	0.0240563		TCT	0.0873305	0.0785195		TCT	0.173332	0.188748	0.183169		TCT	0.225774	0.229406	0.23535		TCT	0.219442	0.229821	0.242769		TCT	0.192432
*Trinucleotide contexts are indicated with bolded text

## Sheet: Supplemental_Fig_4
	Fraction Total Reads mapping to each DNA base
	A		T		G		C
Incubation time (h)	Replicate 1	Replicate 2	Replicate 1	Replicate 2	Replicate 1	Replicate 2	Replicate 1	Replicate 2
0h	0.125502	0.213197	0.263613	0.176867	0.0850186	0.148172	0.525867	0.461764
6h	0.102645	0.153939	0.0631105	0.116629	0.0472114	0.090474	0.787033	0.638958
24h	0.0892348	0.113895	0.0483502	0.0926011	0.0427687	0.0654159	0.819646	0.728088
48h	0.0716247		0.0360994		0.0366381		0.855638
Full	0.12972		0.102465		0.0970206		0.670795

## Sheet: Supplemental_Fig_5_
Figure S5A 0h	Fraction Total Reads			Figure S5B 6h	Fraction Total Reads			Figure S5C 24h	Fraction Total Reads			Figure S5D 48h	Fraction Total Reads		Figure S5E Full	Fraction Total Reads
Trinucleotide Context	Replicate 1	Replicate 2		Trinucleotide Context	Replicate 1	Replicate 2		Trinucleotide Context	Replicate 1	Replicate 2		Trinucleotide Context	Replicate 1		Trinucleotide Context	Replicate 1
ACA	0.00697987	0.0174911		ACA	0.00612367	0.00945745		ACA	0.00484635	0.00610243		ACA	0.00356892		ACA	0.00375407
ACC	0.0127373	0.0119966		ACC	0.00725671	0.0103162		ACC	0.011438	0.0101715		ACC	0.014271		ACC	0.0280694
ACG	0.00240711	0.00568851		ACG	0.00250354	0.00318024		ACG	0.00185163	0.0020628		ACG	0.00136255		ACG	0.00145113
ACT	0.0441882	0.0395337		ACT	0.0485459	0.0417786		ACT	0.0760328	0.0500776		ACT	0.0836401		ACT	0.0442308
CCA	0.0279496	0.028418		CCA	0.0321086	0.0337013		CCA	0.0420869	0.0439393		CCA	0.0453304		CCA	0.0103753
CCC	0.01236	0.00997172		CCC	0.00999845	0.0115929		CCC	0.0133783	0.0142243		CCC	0.0157071		CCC	0.0267489
CCG	0.00448975	0.00656025		CCG	0.00478545	0.00541501		CCG	0.00438506	0.00530629		CCG	0.00420328		CCG	0.00279508
CCT	0.0366952	0.0412847		CCT	0.0412079	0.0464905		CCT	0.0565637	0.0564195		CCT	0.0617829		CCT	0.0532963
GCA	0.00390118	0.0154767		GCA	0.00386693	0.00874893		GCA	0.00294297	0.00562354		GCA	0.00207734		GCA	0.00366967
GCC	0.00507078	0.00756533		GCC	0.00286694	0.00622099		GCC	0.00406144	0.0056485		GCC	0.00423287		GCC	0.0146648
GCG	0.00142616	0.00393632		GCG	0.00137167	0.0023615		GCG	0.0010324	0.00151819		GCG	0.00073032		GCG	0.00121257
GCT	0.0216112	0.0301936		GCT	0.0201854	0.0286562		GCT	0.0325864	0.0314971		GCT	0.0349052		GCT	0.029829
TCA	0.0979068	0.0672648		TCA	0.135094	0.0987539		TCA	0.163169	0.139824		TCA	0.191215		TCA	0.129767
TCC	0.0387477	0.0280958		TCC	0.0420727	0.0377772		TCC	0.0519564	0.0469205		TCC	0.0629971		TCC	0.098258
TCG	0.111965	0.0783159		TCG	0.304342	0.1964		TCG	0.195214	0.179968		TCG	0.14281		TCG	0.0420764
TCT	0.0974314	0.0699711		TCT	0.124703	0.0981075		TCT	0.158101	0.128785		TCT	0.186804		TCT	0.180596
*Trinucleotide contexts are indicated with bolded text

## Sheet: Supplemental_Figure_6
Fig. S6A	Trinucleotide Enrichment for each TCN context									Fig. S6B	Trinucleotide Enrichment for each NCC/CCN context											Fig. S6C	Trinucleotide Enrichment for each NCT context
Timepoint (h)	TCA		TCC		TCG		TCT			Timepoint (h)	ACC		CCA		CCC		CCG		GCC			Timepoint (h)	ACT		CCT		GCT		TCT
6	6.68035	4.88335	3.30534	2.96788	33.316	21.4997	6.15347	4.84112		6	0.626292	0.890342	2.14995	2.2566	1.48338	1.71994	0.822775	0.931016	0.363922	0.789675		6	3.20251	2.75608	3.60111	4.06275	1.7538	2.48978	6.15347	4.84112
24	8.06868	6.91426	4.08182	3.6862	21.3698	19.7009	7.80151	6.35491		24	0.987156	0.877858	2.81809	2.94212	1.98482	2.11033	0.753935	0.912324	0.515548	0.717005		24	5.01577	3.30355	4.94304	4.93044	2.83125	2.73661	7.80151	6.35491
48	9.45553		4.94921		15.6332		9.21786			48	1.23166		3.03527		2.33032		0.722681		0.537309			48	5.51762		5.39914		3.03272		9.21786
60	6.41694		7.7194		4.60605		8.91155			60	2.42253		0.694719		3.96848		0.480565		1.86151			60	2.91784		4.65751		2.59167		8.91155

## Sheet: Supplemental_Figure_7
Fig. S7A	Trinucleotide Enrichment for each TCN context									Fig. S7B	Trinucleotide Enrichment for each NCC/CCN context											Fig. S7C	Trinucleotide Enrichment for each NCT context
Timepoint (h)	TCA		TCC		TCG		TCT			Timepoint (h)	ACC		CCA		CCC		CCG		GCC			Timepoint (h)	ACT		CCT		GCT		TCT
6	10.1728	9.85548	5.93868	5.97195	15.7517	13.213	11.0306	10.7305		6	0.350485	0.39553	0.650662	0.599587	0.635217	0.640115	0.222755	0.197416	0.222276	0.22051		6	5.59826	7.30341	5.62148	6.41264	4.20433	5.12087	11.0306	10.7305
24	10.5448	10.0875	8.07396	7.93779	8.97167	7.82107	12.3501	11.9012		24	0.738861	0.910165	0.469109	0.363134	0.966359	0.888176	0.154112	0.114901	0.433136	0.477325		24	5.47706	6.70546	5.62505	5.54535	4.09779	4.33116	12.3501	11.9012
48	9.7194	8.82578	9.40196	8.81196	7.40062	6.37184	12.1873	11.3569		48	1.1422	1.46149	0.359245	0.288493	1.32392	1.29003	0.13429	0.110505	0.684149	0.810293		48	4.87229	5.88302	5.21017	5.20518	3.64409	3.96888	12.1873	11.3569

[truncated: 13 more sheets: Figure4, Figure5, Figure6, Figure7, Figure8, Supplemental_Figure_8, Supplemental_Figure_9, Supplemental_Figure_10, Supplemental_Figure_11, Supplemental_Figure_12, Supplemental_Figure_13, Supplemental_Figure_14, Supplemental_Figure_15]
