# Supplementary material for: Genome-wide maps of CPD deamination in yeast reveal the impact of DNA sequence context and nucleosome architecture on cytosine deamination rates
Source: HighWire-hosted journal article supplement (doi:10.1101/gr.280384.124), 2025-12-09
Supplement: Supplemental_Fig_S1.pdf [file Supplemental_Fig_S1.pdf]

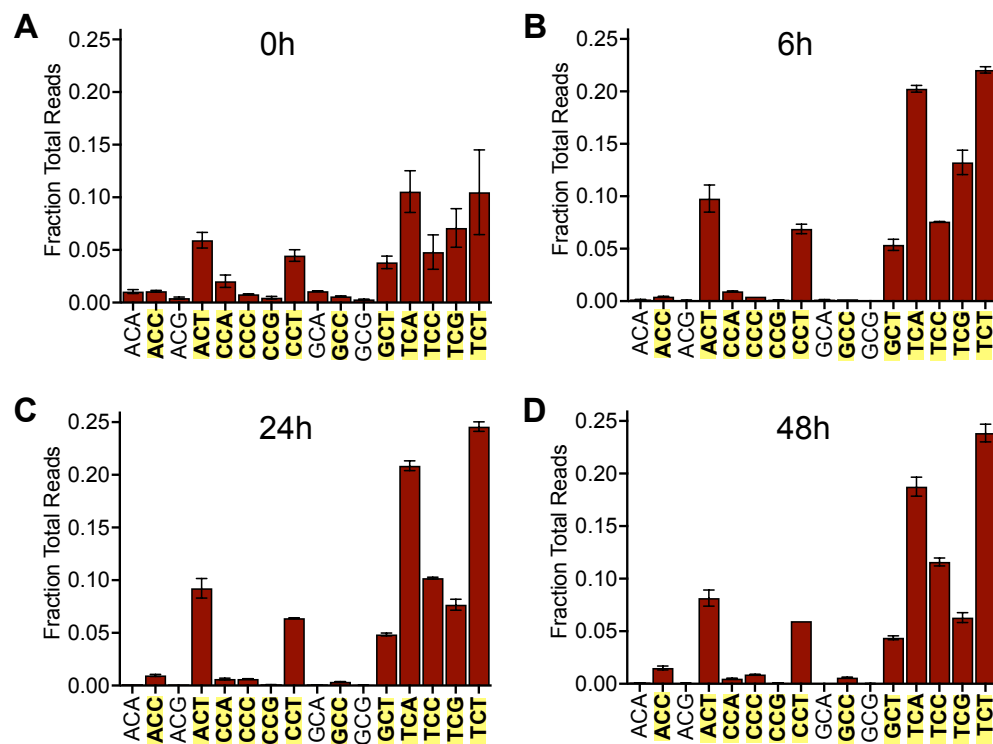

**Supplemental Fig. S1.** Genome-wide cytosine deamination in CPD lesions is strongly modulated by neighboring bases in isolated yeast genomic DNA incubated at 37°C for (A) 0h, (B) 6h, (C) 24h and (D) 48h following UV irradiation *in vitro*. The fraction of total dCPD-seq reads was analyzed for each cytosine-central trinucleotide. dCPD-seq reads are strongly associated with trinucleotides containing dipyrimidines contexts (shown bolded with yellow highlighting). Panel C is same as Fig. 1F. All deamination timepoints represent the average and SEM from two independent experiments and dCPD-seq library preparations.
