# Supplementary material for: Genome-wide maps of CPD deamination in yeast reveal the impact of DNA sequence context and nucleosome architecture on cytosine deamination rates
Source: HighWire-hosted journal article supplement (doi:10.1101/gr.280384.124), 2025-12-09
Supplement: Supplemental_Fig_S5.pdf [file Supplemental_Fig_S5.pdf]

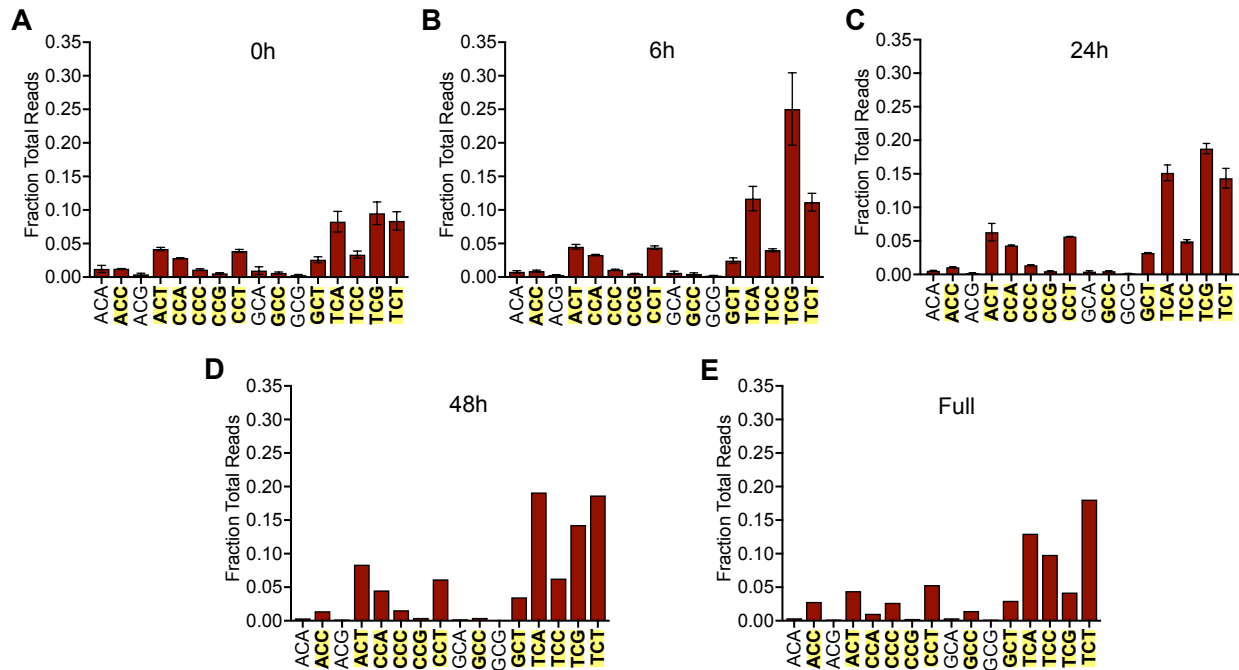

**Supplemental Fig. S5.** Deamination of cytosine bases in UV-irradiated yeast cells

deaminated at 37°C as naked DNA *in vitro* is strongly modulated by neighboring bases following UV exposure. **A-E.** Graphs show the fraction of total dCPD-seq reads mapping to each cytosine-central trinucleotide obtained from genomic DNA isolated from UV irradiated *rad14Δ cdc13-1* G2/M arrested cells that was then incubated as naked DNA *in vitro* at 37°C for **(A)** 0h, **(B)** 6h, **(C)** 24h, and **(D)** 48h following UV irradiation.

Additionally, a **(E)** “Full” deaminated control was prepared by subjecting gDNA that had been incubated 48h at 37°C to an additional 16h, 67°C incubation. The fraction of total dCPD-seq reads was analyzed for each cytosine-central trinucleotide. dCPD-seq reads in libraries created from UV-irradiated cells strongly correlate to trinucleotides containing dipyrimidines contexts (shown bolded with yellow highlighting). 0h, 6h, and 24h results represent the average and SEM from two independent experiments and dCPD-seq

library preparations, while 48h and “Full” deamination timepoints are each derived from a single experiment and library preparation.
