# Supplementary material for: Genome-wide maps of CPD deamination in yeast reveal the impact of DNA sequence context and nucleosome architecture on cytosine deamination rates
Source: HighWire-hosted journal article supplement (doi:10.1101/gr.280384.124), 2025-12-09
Supplement: Supplemental_Fig_S7.pdf [file Supplemental_Fig_S7.pdf]

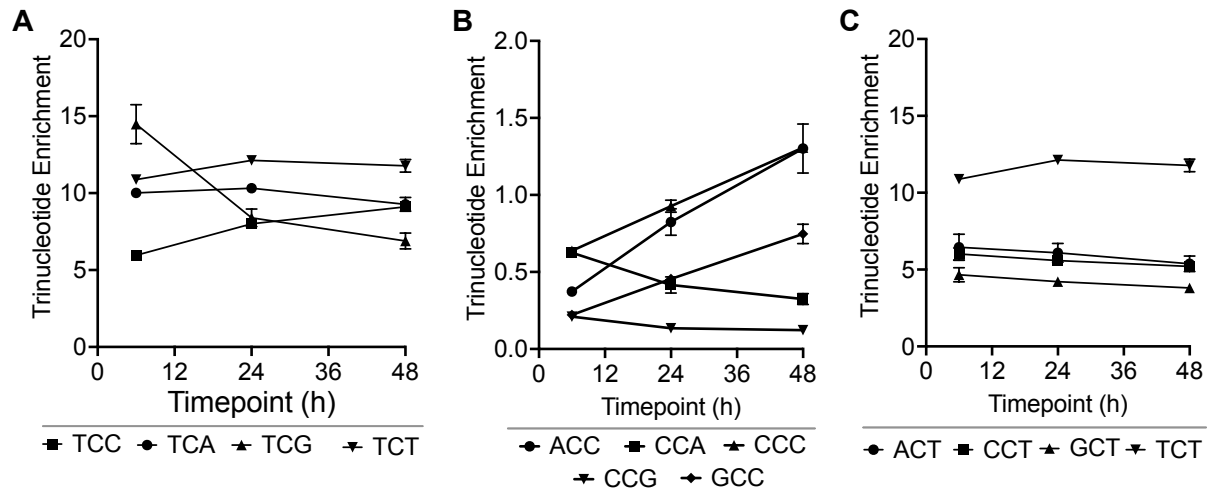

**Supplemental Fig. S7.** The rate of CPD deamination in isolated yeast genomic DNA *in vitro* is influenced by neighboring DNA bases. The fraction of total reads mapping to each cytosine-central trinucleotide context was normalized by the frequency of trinucleotide occurrence (resulting in “trinucleotide enrichment”) in the yeast genome and plotted as a function of 37°C incubation time post UV exposure. The results were group by **(A)** TCN, **(B)** NCC/CCN, and **(C)** NCT contexts.
