# Supplementary material for: Genome-wide maps of CPD deamination in yeast reveal the impact of DNA sequence context and nucleosome architecture on cytosine deamination rates
Source: HighWire-hosted journal article supplement (doi:10.1101/gr.280384.124), 2025-12-09
Supplement: Supplemental_Fig_S9.pdf [file Supplemental_Fig_S9.pdf]

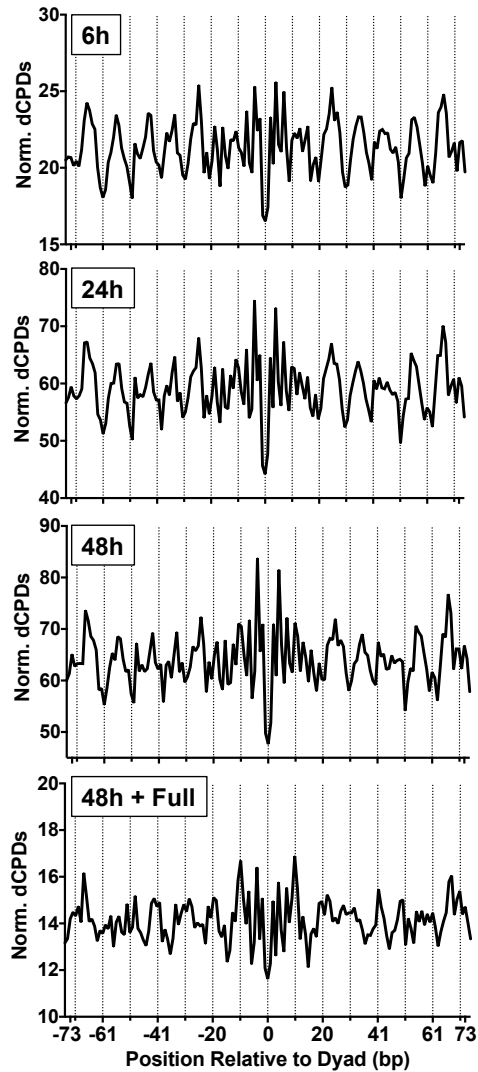

**Supplemental Fig. S9.** Normalized dCPD-seq reads for the indicated cellular deamination time points are suppressed at minor-out rotational settings and elevated at minor-in rotational settings in strongly positioned nucleosomes. dCPDs were counted at each position relative to the central dyad of ~10,000 strongly positioned nucleosomes. Dashed lines indicate minor-out rotational settings. dCPDs were normalized by the frequency of cytosine bases in dipyrimidine sequences. Nucleosome positioning data is from (BROGAARD *et al.* 2012).
