# Supplementary material for: Genome-wide maps of CPD deamination in yeast reveal the impact of DNA sequence context and nucleosome architecture on cytosine deamination rates
Source: HighWire-hosted journal article supplement (doi:10.1101/gr.280384.124), 2025-12-09
Supplement: Supplemental_Fig_S10.pdf [file Supplemental_Fig_S10.pdf]

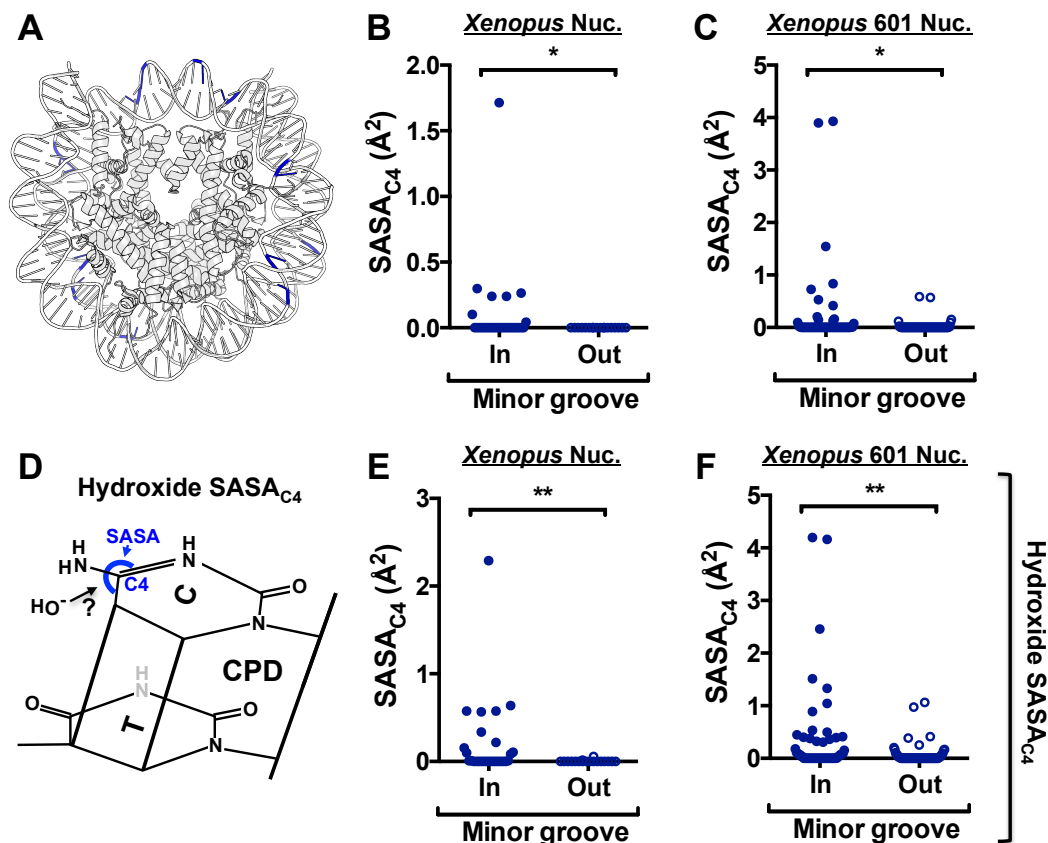

**Supplemental Fig. S10.** Solvent accessible surface area (SASA) of carbon-4 (C4) positions in cytosine bases is significantly elevated at minor-in rotational settings relative to minor-out rotational settings in nucleosome structures. **A.** Visualization of the solvent accessible surface area of the C4 (SASA<sub>C4</sub>) atom for cytosine bases in the yeast nucleosome structure (WHITE *et al.* 2001). Cytosine bases in which the SASA<sub>C4</sub> is nonzero are highlighted in blue. Image generated using PyMOL. **B,C.** Quantification of the SASA<sub>C4</sub> for cytosine bases in the *Xenopus* (**B**) 1KX5 nucleosome structure (DAVEY *et al.* 2002) and (**C**) 3LZ0 and 3LZ1 601 DNA sequence-containing nucleosome structures (VASUDEVAN *et al.* 2010). \*P < 0.05 based on Mann-Whitney *U* test. **D.** Same as Figure 6A, except showing solvent accessible surface area (SASA) for hydrolytic

attack of C4 atom in cytosine by hydroxide. **E,F.** Quantification of the  $SASA_{C4}$  for hydroxide (radius  $\sim 1.1\text{\AA}$ ) for cytosine bases in the *Xenopus* (**E**) 1KX5 nucleosome structure (DAVEY *et al.* 2002) and (**F**) 3LZ0 and 3LZ1 601 DNA sequence-containing nucleosome structures (VASUDEVAN *et al.* 2010). \*\*P < 0.01 based on Mann-Whitney *U* test.
