# Supplementary material for: Genome-wide maps of CPD deamination in yeast reveal the impact of DNA sequence context and nucleosome architecture on cytosine deamination rates
Source: HighWire-hosted journal article supplement (doi:10.1101/gr.280384.124), 2025-12-09
Supplement: Supplemental_Fig_S11.pdf [file Supplemental_Fig_S11.pdf]

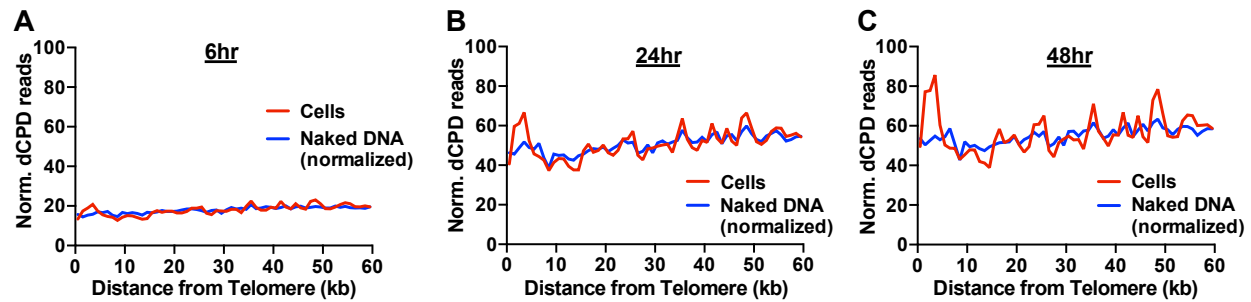

**Supplemental Fig. S11.** Slight increase in deaminated CPDs (dCPDs) in telomere-proximal regions (i.e., within ~5 kb from telomere end) in cells deaminated for **(A)** 6h, **(B)** 24h, and **(C)** 48h, but not the naked DNA deamination control. dCPD-seq reads were aggregated in 1kb bins relative to the nearest telomere and were normalized to the number of cytosines in a dipyrimidine context in each bin. Naked DNA deamination control was normalized/scaled to match the cellular samples.
