# Supplementary material for: Genome-wide maps of CPD deamination in yeast reveal the impact of DNA sequence context and nucleosome architecture on cytosine deamination rates
Source: HighWire-hosted journal article supplement (doi:10.1101/gr.280384.124), 2025-12-09
Supplement: Supplemental_Fig_S13.pdf [file Supplemental_Fig_S13.pdf]

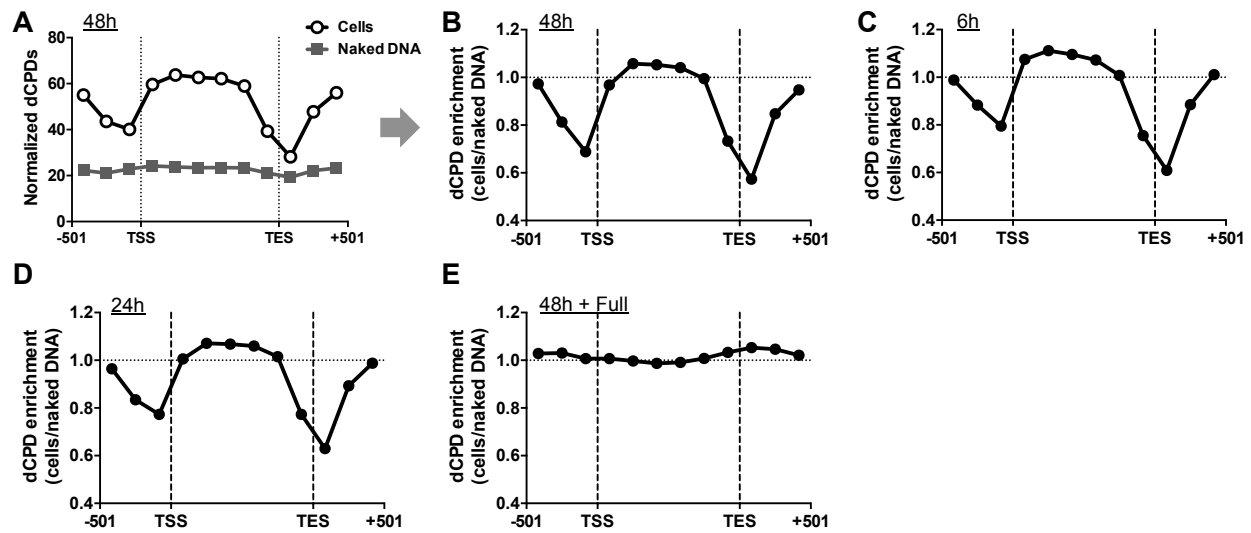

**Supplemental Fig. S13.** Same as Fig. 4A-E, except genes in which the TSS and/or TES were located within 5 kb of telomere end were excluded from the analysis. The *CAN1*, *URA3*, *ADE2*, and *LYS2* genes, which are located in the telomere-proximal mutation reporter, were also excluded.
