# Supplementary material for: Genome-wide maps of CPD deamination in yeast reveal the impact of DNA sequence context and nucleosome architecture on cytosine deamination rates
Source: HighWire-hosted journal article supplement (doi:10.1101/gr.280384.124), 2025-12-09
Supplement: Supplemental_Fig_S14.pdf [file Supplemental_Fig_S14.pdf]

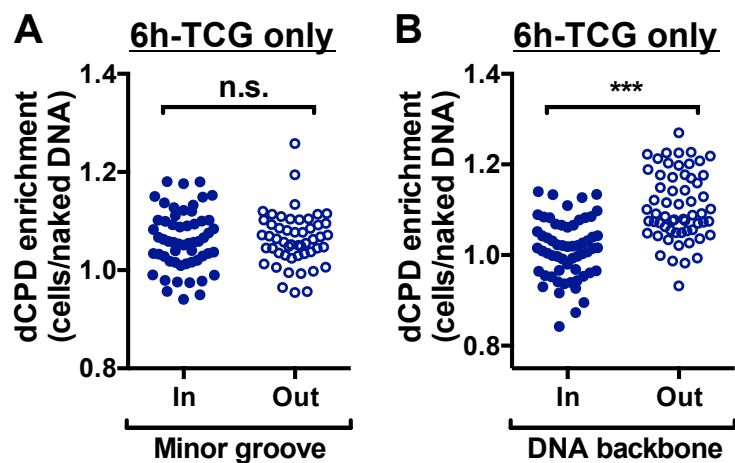

**Supplemental Fig. S14.** Deaminated CPDs (dCPDs) enrichment in cells versus the naked DNA deamination control for TCG sequence contexts are not significantly elevated in **(A)** minor-in versus minor-out rotational settings, but are significantly elevated in **(B)** DNA backbone-out positions relative to backbone-in positions. \*\*\* $P < 0.0001$ ; n.s. (not significant) indicates  $P > 0.05$ , based on Mann Whitney  $U$  test.
