# Supplementary material for: Genome-wide maps of CPD deamination in yeast reveal the impact of DNA sequence context and nucleosome architecture on cytosine deamination rates
Source: HighWire-hosted journal article supplement (doi:10.1101/gr.280384.124), 2025-12-09
Supplement: Supplemental_Fig_S15.pdf [file Supplemental_Fig_S15.pdf]

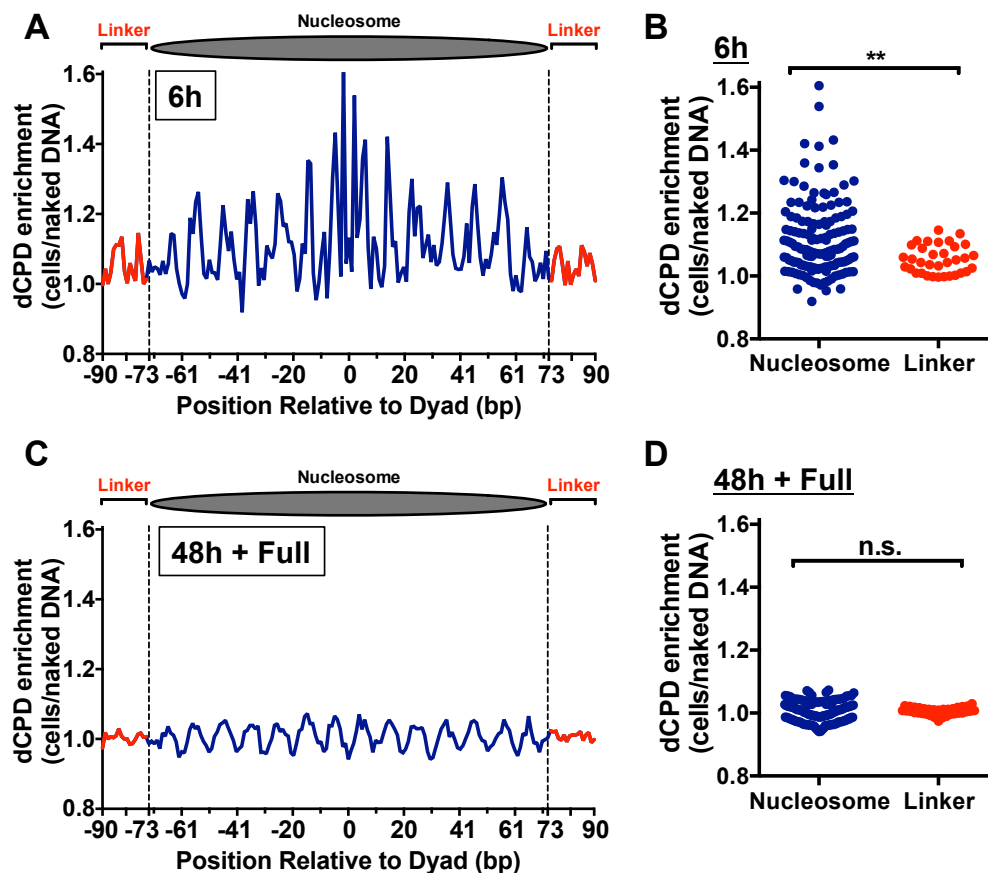

**Supplemental Fig. S15.** CPD deamination is elevated in nucleosome DNA relative to adjacent linker regions. **(A)** Plot of dCPD enrichment after 6h deamination in UV-irradiated cells relative to the naked DNA control in ~10,000 strongly positioned nucleosomes and adjacent linker regions (indicated in red). **(B)** Comparison of dCPD enrichment in positions within strongly positioned nucleosomes (i.e., -73 to +73 relative to dyad) relative to linker positions (i.e., -90 to -74 and +74 to +90). \*\* $P < 0.01$  based on Mann Whitney  $U$  test. **(C-D)** Same as panels A,B, except for 48h deamination sample that was fully deaminated *in vitro*. n.s. (not significant) indicates  $P > 0.05$ , based on Mann Whitney  $U$  test.
